# Supplementary material for: Field study of a web service for stimulating the positive side of stress: entrepreneurs’ experiences and design implications
Source: Springer Nature journal article supplement (doi:10.1186/s12911-019-0909-6), 2019-10-28
Supplement: 12911_2019_909_MOESM1_ESM.pdf [file 12911_2019_909_MOESM1_ESM.pdf]

## User experience questionnaire 1: Eustress Toolbox service

This questionnaire concerns the usage of the Eustress Toolbox service (later "service"). Responding to the questionnaire takes about 10 minutes. The purpose of the questionnaire is to find out your first impressions of the service. Please respond to the questionnaire as soon as possible.

The responses will be analyzed so that the identity of a respondent is not revealed.

Please respond to all questions. Thank you for your response!

**1. How many times have you used the service thus far?**

- None
- Once
- A couple of times
- More frequently

**2. What is your first impression of the service?**

---

---

---

---

**3. What were your expectations of the service? Have they been met so far?**

---

---

---

---

**4. Was the introduction to the usage of the service (in a face-to-face meeting or by phone) sufficient?**

- Yes
- No

**5. How did you find taking the service into use?**

---

---

---

---

**6. How have you started familiarizing yourself with the toolsets of the service?**

- I haven't started yet
- I started from the toolset recommended by the service
- I started from the first toolset
- I started from a toolset that seemed interesting
- Otherwise, how? \_\_\_\_\_

**7. Have you integrated the service into your daily work and life? How?**

---

---

---

---

8. **Select the option that best describes your experience to each statement.**  
(Likert scale from 1 to 5 (1=not at all useful to 5 = very useful, and 0 = can't say))

It was easy to learn to use the service  
The service use fits into my daily life  
I find the service attractive  
I enjoy using the service  
The appearance of the service is pleasant  
The content of the service is useful  
The content of the service is interesting  
The recommendations of the areas to focus on provided by the service  
seemed right to me  
The service works without disturbance  
I trust the information and content of the service  
It is easy to use the service  
It is easy to navigate within the service  
The structure of the service is clear

**You can comment on your response here.**

---

---

---

---

9. **Have you found something interesting or useful from the web service thus far?**

---

---

---

---

10. **Has there been something useless or disturbing in the web service?**

---

---

---

---

11. **How do you find the content of the service thus far?**

(Likert scale, (Likert scale from 1 to 5 (1=totally disagree to 5 = totally agree, and 0 = can't say))

The amount of content is suitable  
The level of detail is suitable  
The content is understandable  
The content does not provide anything new  
The content is presented in an interesting way

12. **Did the content meet your expectations? Should the content be different?**

---

---

---

---

**13. Have you searched for more information on the topics of the service?**

- Yes
- No

**14. If you have searched for more information, what kind of information and where?**

---

---

---

---

**15. How would you rate the service based on your usage thus far? Give an overall score on a scale from 0 to 10.**

---

**16. How likely would you recommend the service to others, like your friends or work community? Give an overall score on a scale from 0 to 10.**

---

**To whom would you recommend the service? Why?**

---

---

---

---

**17. Free thoughts: Frustrating or delightful experiences, development ideas, wishes for new content or something else?**

---

---

---

---

---

---

---

---

You will receive another questionnaire after the 6-week period.

**Many thanks for your response!**
