# Supplementary material for: Field study of a web service for stimulating the positive side of stress: entrepreneurs’ experiences and design implications
Source: Springer Nature journal article supplement (doi:10.1186/s12911-019-0909-6), 2019-10-28
Supplement: 12911_2019_909_MOESM3_ESM.pdf [file 12911_2019_909_MOESM3_ESM.pdf]

## Theme interview for the participants of the study

### 1. Background

- a) Could you tell shortly about you and your business?
- b) What is your daily work like?
- c) How was your work and life during the piloting of the service (work, perceived stress, special events, family etc)?

### 2. Eustress phenomenon

- a) When you started the research process, how familiar were you with the phenomenon of positive stress?
- b) How often / when do you recognize a feeling of positive stress?
- c) What kinds of factors facilitate your experience of positive stress?
- d) Can you give an example of a recent situation at work when you have felt positive stress?
- e) Do you think that this perspective (the positive side of stress) is relevant for you or would it be better to concentrate on minimizing negative stress only?

### 3. Usage of Eustress web service

- a) Background: Have you used well-being related web services or other digital solutions before?
- b) How did you use the Eustress service?
  - I. When did you use it (what time / in what kind of situations / mental state)?
  - II. Where did you use it? Which device did you use for accessing the service?
  - III. Did you have specific routines or ways of using the service?
  - IV. Did you use the service by yourself or with others?
  - V. Did you talk about the service with others? With whom? Did you want to share something?
- c) Can you recall a good and/or a bad usage experience? Could you tell about them?
  - I. What kind of feelings did you have?
- d) Which part(s) of the service did you like most?
  - i. Which topics did you find useful? Why?
  - ii. Which tasks were the most useful for you? Why?
- e) Which part(s) of the service did you not like? What did not work for you? Why?
- f) What was missing from the service?
- g) Did you try out the mobile applications provided in the service? What did you think about them?
- h) Did using the service become a part of your daily life? Why / why not? How could it integrate better to your work and life?
- i) What kind of development ideas do you have?

#### **4. Learning of skills and perceived benefits**

- a) Do you think that you have learned something new from using the web service? What have you learned?
- b) Have you learned something about yourself and your experiences of stress?
  - i. Has your impression and understanding of the phenomenon of positive stress changed during the trial? How?
- c) Did the usage have some impact to you or your daily life? What kind of impact?
  - i. Impact on your work / work day / work community?
- d) What factors facilitated (e.g. increased, deepened or speeded up) or hindered learning new skills?
- e) Did you have expectations that were not met, e.g. skills that you would have liked to gain but you did not (at least during this usage period)?

#### **5. Free comments**

- a) Would you like to add something or tell more about your experiences with the service?
