# Supplementary material for: Field study of a web service for stimulating the positive side of stress: entrepreneurs’ experiences and design implications
Source: Springer Nature journal article supplement (doi:10.1186/s12911-019-0909-6), 2019-10-28
Supplement: 12911_2019_909_MOESM4_ESM.pdf [file 12911_2019_909_MOESM4_ESM.pdf]

*Eustress*

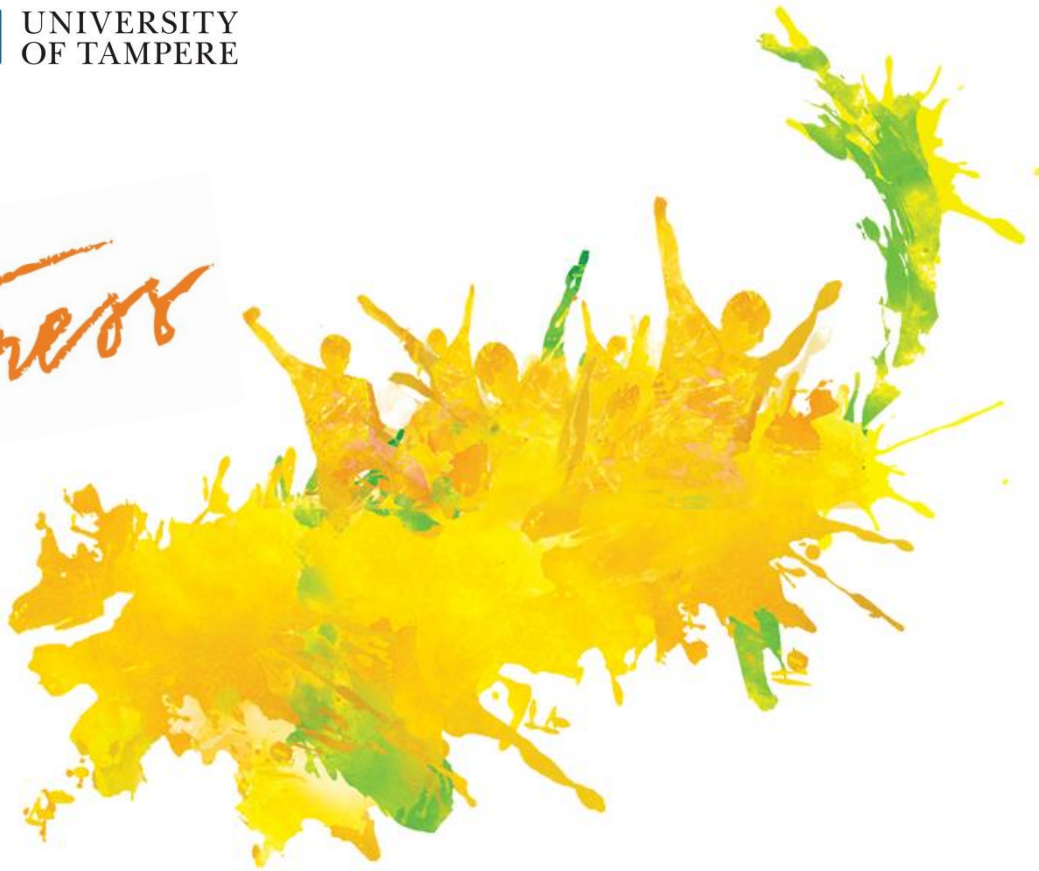

# Eustress tool

## Introduction of the web service

Päivi Heikkilä, Elina Mattila and Mari Ainasoja

# Taking into use (1/2)

Web address:  
hyvastressi.fi

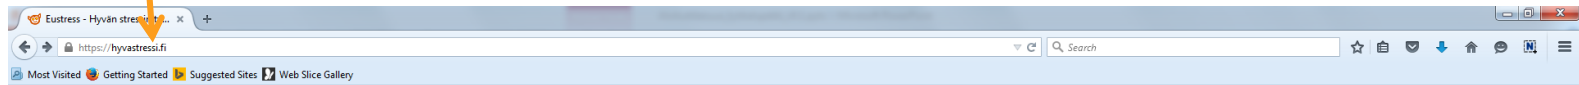

*Eustress*

Kirjaudu sisään

Olet kirjautunut ulos.

## Hyvän stressin työkalupakin tutkimusversio

Mikä ihmeen hyvä stressi?

### Hyvä stressi = Eustressi

Eustressiä kokiessasi nautit työn tekemisestä paineen tunteesta huolimatta tai juuri sen vuoksi. Eustressi on hyvälaatuista stressiä: voimavara, joka antaa draivia innostumiseen, oppimiseen, uuden luomiseen ja tehokkuuden lisäämiseen.

Hyvän stressin työkalupakkiin on koottu keinoja, joilla hyvää stressiä voi luoda ja ylläpitää omassa työssä ja arjessa. Työkalupakki on tällä hetkellä tutkimuskäytössä.

Ota työkalupakki käyttöön

[Eustress-hankeen sivuille](#)

Take the tool into  
use

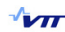

UNIVERSITY  
OF TAMPERE

Sivuston toteutus: [Headsted Oy](#)  
Käyttöehdot ja rekisteriseloste

*Eustress*

# Taking into use (2/2)

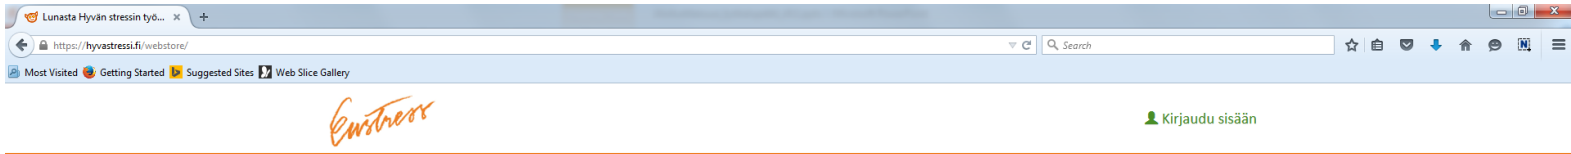

## Hyvän stressin työkalupakki

### Vaihe 1/3: Käyttäjätilin luominen

Huom! Ennen kuin luot tilin, oletthan saanut lunastuskoodin työkalupakki varten? Ilman koodia et pääse vielä tutustumaan pakkiin.

Luo ensin käyttäjätili tai kirjaudu sisään. Palvelun käyttöoikeus liitetään antamaasi sähköpostiosoitteeseen. Voit vaihtaa valitsemasi salasanan myöhemmin.

Luo uusi käyttäjätili

Jatka eteenpäin

Onko sinulla jo käyttäjätili?

Kirjaudu sisään

Olet lunastamassa palvelua:

Hyvän stressin työkalupakki.

Eustressi kokkaisasi nautit työn tekemisestä paineen tunteesta huolimatta tai juuri sen vuoksi. Eustressi on hyvälaatuista stressiä: voimavara, joka antaa draivia innoitumiseen, oppimiseen, uuden luomiseen ja tehokkuuden lisäämiseen. Työkalupakki antaa sinulle konkreettisia välineitä positiivisen stressin lisäämiseen työhösi ja elämääsi.

Your email address and password

# Login

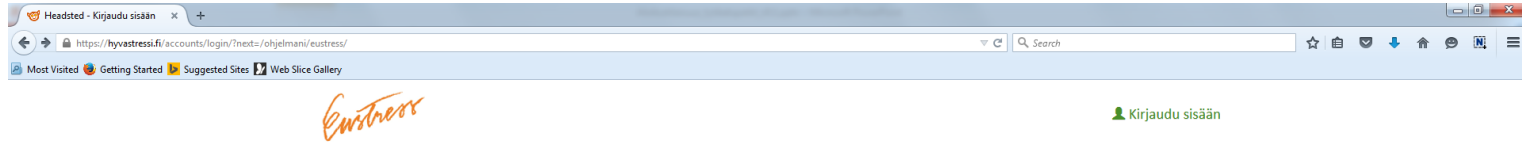

## Kirjaudu sisään

Sähköposti:

Salasana:

Muista minut:

The same email address and password that were entered earlier

"Remember me" makes login easier later

# Starting to use the service

The screenshot shows the Eustress web application interface. At the top, there is a navigation bar with the Eustress logo, a user profile icon, and a search bar. Below the navigation bar, a green banner indicates the user is logged in. The main content area features a grid of toolset cards. The first card is 'Aloita tästä' (Start here) with the subtext 'Tutustu ja testaa'. The second card is 'Peilaaminen ja suuntaaminen' (Reflection and orientation) with the subtext 'Tutki kokemuksia ja ajatuksia'. The third card is 'Työn organisoiminen' (Work organization) with the subtext 'Suunnittele työtavat mielekkäiksi'. Below these are two smaller cards: 'Esittely' (Introduction) with a progress indicator '0/3' and 'Alkukartoitus' (Initial assessment). The bottom row includes 'Myönteisen paineen rakentaminen' (Building positive pressure) with the subtext 'Luo haasteita, hae palautetta', 'Ilon ja onnistumisten vaaliminen' (Maintaining joy and success) with the subtext 'Vaali positiivista virettä', 'Virittäytyminen' (Tuning) with the subtext 'Lataudu ja keskity olennaiseen', 'Palautuminen' (Recovery) with the subtext 'Rentoudu ja pidä huolta itsestäsi', and 'Lopuksi' (Finally) with the subtext 'Miten työstäminen sujui?'. An orange box on the left contains the text 'Introduction and a screening questionnaire for identifying the most useful toolsets' with an arrow pointing to the 'Esittely' card.

Introduction  
and a  
screening  
questionnaire  
for identifying  
the most  
useful toolsets

# Screening questionnaire

Hyvän stressin työkalupakk... x +

https://hyvastressi.fi/ohjelmani/sisalto/eustress/lahtotesti/

Moost Visited Getting Started Suggested Sites Web Slice Gallery

*Eustress* Työkalupakki Pohdinnat

## Hyvän stressin työkalupakki

### Alkukartoitus

Alkukartoituksen tarkoitus on arvioida vahvuutesi työkalupakin eri teemojen näkökulmista. Täytettyäsi kyselyn saat ehdotuksen sinulle parhaiten sopivista työkaluista hyvän stressin taitojen kehittämiseen.

Mitä mieltä olet alla olevista väittämistä?

|                                                                                                                            | Täysin eri mieltä     | Eri mieltä            | Hiukan eri mieltä     | Ei samaa eikä eri mieltä | Hiukan samaa mieltä   | Samaa mieltä          | Täysin samaa mieltä   |
|----------------------------------------------------------------------------------------------------------------------------|-----------------------|-----------------------|-----------------------|--------------------------|-----------------------|-----------------------|-----------------------|
| Minulla on tapana pohtia ja arvioida omia työskentelytapojani säännöllisesti.                                              | <input type="radio"/> | <input type="radio"/> | <input type="radio"/> | <input type="radio"/>    | <input type="radio"/> | <input type="radio"/> | <input type="radio"/> |
| Tehostan työtäni luomalla itselleni haastavia tavoitteita ja aikatauluja.                                                  | <input type="radio"/> | <input type="radio"/> | <input type="radio"/> | <input type="radio"/>    | <input type="radio"/> | <input type="radio"/> | <input type="radio"/> |
| Minulla on tapana tehdä työni suunnittelua, aikatauluttamista ja priorisointia itselleni näkyväksi, esim. tehtävälistoina. | <input type="radio"/> | <input type="radio"/> | <input type="radio"/> | <input type="radio"/>    | <input type="radio"/> | <input type="radio"/> | <input type="radio"/> |
| Pidän riittävästi vapaapäiviä sekä taukoja työpäivän keskellä.                                                             | <input type="radio"/> | <input type="radio"/> | <input type="radio"/> | <input type="radio"/>    | <input type="radio"/> | <input type="radio"/> | <input type="radio"/> |
| Osaan tietoisesti keskittyä tehtävään sulkemalla muut asiat pois mielestäni.                                               | <input type="radio"/> | <input type="radio"/> | <input type="radio"/> | <input type="radio"/>    | <input type="radio"/> | <input type="radio"/> | <input type="radio"/> |
| Hyödynnän yhdessä ideointia ja yhdessä tekemistä työssäni riittävästi.                                                     | <input type="radio"/> | <input type="radio"/> | <input type="radio"/> | <input type="radio"/>    | <input type="radio"/> | <input type="radio"/> | <input type="radio"/> |
| Pohdin ja käsittelen asioita yhdessä toisten kanssa aina kun siihen on tarvetta.                                           | <input type="radio"/> | <input type="radio"/> | <input type="radio"/> | <input type="radio"/>    | <input type="radio"/> | <input type="radio"/> | <input type="radio"/> |
| Pidän positiivista virettä yllä huumorin ja hulluttelun avulla.                                                            | <input type="radio"/> | <input type="radio"/> | <input type="radio"/> | <input type="radio"/>    | <input type="radio"/> | <input type="radio"/> | <input type="radio"/> |
| Saan kriittisestä palautteesta työhöni lisäpotkua.                                                                         | <input type="radio"/> | <input type="radio"/> | <input type="radio"/> | <input type="radio"/>    | <input type="radio"/> | <input type="radio"/> | <input type="radio"/> |
| Löydän kiperissäkin tilanteissa myönteisiä näkökulmia ja uusia mahdollisuuksia.                                            | <input type="radio"/> | <input type="radio"/> | <input type="radio"/> | <input type="radio"/>    | <input type="radio"/> | <input type="radio"/> | <input type="radio"/> |
| Hakeudun aktiivisesti innostaviin työtehtäviin ja pyrin löytämään työlleni merkityksen.                                    | <input type="radio"/> | <input type="radio"/> | <input type="radio"/> | <input type="radio"/>    | <input type="radio"/> | <input type="radio"/> | <input type="radio"/> |
| Muistan myös juhlistaa onnistumisia.                                                                                       | <input type="radio"/> | <input type="radio"/> | <input type="radio"/> | <input type="radio"/>    | <input type="radio"/> | <input type="radio"/> | <input type="radio"/> |
| Tunnistan omasta kehostani ja käytöksestäni, jos olen stressaantunut.                                                      | <input type="radio"/> | <input type="radio"/> | <input type="radio"/> | <input type="radio"/>    | <input type="radio"/> | <input type="radio"/> | <input type="radio"/> |
| Kun jumuidun työtehtävän kanssa, etsin vaihtoehtoisia tapoja edetä.                                                        | <input type="radio"/> | <input type="radio"/> | <input type="radio"/> | <input type="radio"/>    | <input type="radio"/> | <input type="radio"/> | <input type="radio"/> |

# Feedback from the screening questionnaire

Hyvän stressin työkalupakki

## Alkukartoitus

Alkukartoituksen tarkoitus on arvioida vahvuutesi työkalupakin eri teemojen näkökulmista. Täytettyäsi kyselyn saat ehdotuksen sinulle parhaiten sopivista työkaluista hyvän stressin taitojen kehittämiseen.

Teit kartoituksen viimeksi 5.10.2015.

Alkukartoituksen pohjalta näyttäisi siltä, että sinulle hyödyllisimmät työkalut löytyisivät seuraavista työkalusarjoista:

- ★ Myönteisen paineen rakentaminen
- ★ Palautuminen

Ryhdy tutustumaan työkalusarjoihin esimerkiksi yllä olevassa järjestyksessä tai oman kiinnostuksesi mukaan.

[Tee uudelleen](#) [Takaisin työkalupakkiin >](#)

The researchers can see only the summary of the scores, not responses to the individual questions

# Structure of the service (1/2)

The screenshot shows the Eustress service interface. At the top, there is a navigation bar with the Eustress logo on the left and links for 'Työkalupakki', 'Pohdinnat', and a user profile icon on the right. A 'Settings and logout' callout box points to the user profile icon. Below the navigation bar is a grid of toolset cards. A 'Progress bar' callout box points to a green progress bar in the first card, 'Aloita tästä'. The grid contains the following toolsets: 'Aloita tästä' (Tutustu ja testaa), 'Peilaaminen ja suuntaaminen' (Tutki kokemuksia ja ajatuksia), 'Työn organisointi' (Suunnittele työtavat mielekkäiksi), 'Myönteisen paineen rakentaminen' (Luo haasteita, hae palautetta), 'Ilon ja onnistumisten vaaliminen' (Vaali positiivista virettä), 'Virittäytyminen' (Lataudu ja keskity olennaiseen), 'Palautuminen' (Rentoudu ja pidä huolta itsestäsi), and 'Lopuksi' (Miten työstäminen sujui?). A 'Tool sets' callout box points to the 'Työn organisointi' and 'Virittäytyminen' cards. A 'Recommendation for a toolset based on the screening questionnaire' callout box points to the 'Palautuminen' card. A 'Follow-up questionnaire and feedback: opens 3 weeks after starting to use the service' callout box points to the 'Lopuksi' card. The footer contains logos for VTT and the University of Tampere, along with the text 'Sivuston toteutus: Headsted Oy' and 'Käyttöehdot ja rekisteriseloste'.



# Structure of the service (2/2)

The screenshot shows the Eustress web application interface. At the top, there is a navigation bar with the Eustress logo, a search bar, and user profile information. The main content area features a grid of task cards. Each card has a title, a progress indicator (a circle with a checkmark or a number), and a brief description. The cards are organized into sections: 'Aloita tästä' (Start here), 'Peilaaminen ja suuntaaminen' (Reflection and orientation), 'Työn organisoiminen' (Organizing work), and 'Myönteisen paineen rakentaminen' (Building positive pressure). The 'Peilaaminen ja suuntaaminen' section is highlighted with a blue border. A central grid of 10 task cards is shown, with progress indicators ranging from 0/4 to 4/4. An orange box labeled 'Progress circle' points to the progress indicator of the second card in the top row. Another orange box labeled 'Introduction of the toolset' points to the first card in the top row. A third orange box labeled 'Tools' points to the first card in the bottom row. A fourth orange box labeled 'Offline exercises and 3rd party applications to support practising the skills' points to the last card in the bottom row.

**Introduction of the toolset**

**Tools**

**Progress circle**

**Offline exercises and 3rd party applications to support practising the skills**

# Content of a tool (1/4): Description

Hyvän stressin työkalupakki > Peilaaminen ja suuntaaminen > Työkalu 2: Näkökulman vaihtaminen

Kuvaus Esimerkit Pohdi Palaute

Työkalu 2: Näkökulman vaihtaminen

"Keskityn hyvään ja siirryn hetkeen"

Myönteisyys ja avoimuus sekä nykyhetkeen keskittyminen edistävät positiivista stressiä.

Tämä työkalu auttaa sinua vaihtamaan näkökulmaasi avoimenmieliseksi ja myönteisemmäksi. Se myös haastaa sinua siirtymään eteenpäin päästämällä menneistä tapahtumista ja kokemuksista irti.

Jatka >

Proceeding: two options

# Content of a tool (2/4): Example quotes

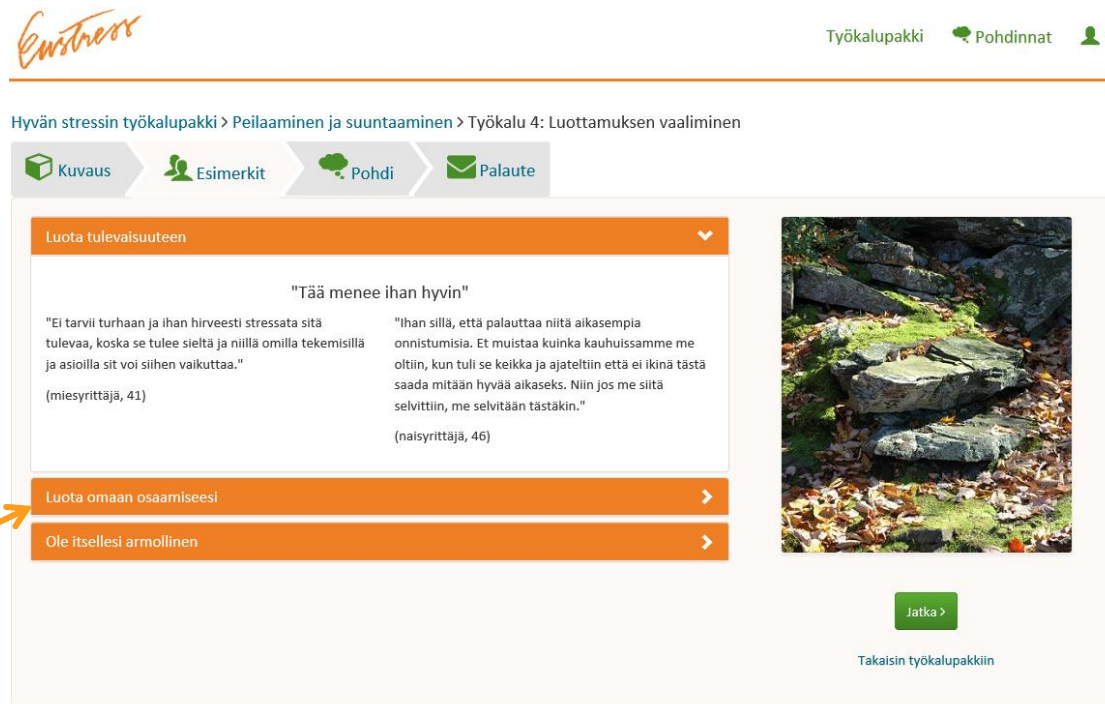

The screenshot shows the Ewstress tool interface. At the top left is the Ewstress logo. At the top right are navigation links: Työkalupakki, Pohdinnat, and a user icon. Below the header is the breadcrumb trail: Hyvän stressin työkalupakki > Peilaaminen ja suuntaaminen > Työkalu 4: Luottamuksen vaaliminen. A navigation bar contains four tabs: Kuvaus, Esimerkit, Pohdi, and Palaute. The main content area displays a quote under the heading "Luota tulevaisuuteen". The quote is: "Tää menee ihan hyvin". Below the quote are two columns of text. The left column reads: "Ei tarvii turhaan ja ihan hirveesti stressata sitä tulevaa, koska se tulee sieltä ja niillä omilla tekemisillä ja asioilla sit voi siihen vaikuttaa." (miesyrittäjä, 41). The right column reads: "Ihan sillä, että palauttaa niitä aikasempia onnistumisia. Et muistaa kuinka kauhuissamme me oltiin, kun tuli se keikka ja ajateltiin että ei ikinä tästä saada mitään hyvää aikaseks. Niin jos me siitä selvittiin, me selvitään tästäkin." (naisyrittäjä, 46). To the right of the quote is a photograph of a stone path in a forest. Below the quote are two orange buttons: "Luota omaan osaamiseesi" and "Ole itsellesi armollinen". At the bottom right of the main content area is a green "Jatka >" button and a link "Takaisin työkalupakkiin".

**Open more examples by clicking**

# Content of a tool (3/4): Reflection exercise

Hyvän stressin työkalupakki > Peilaaminen ja suuntaaminen > Työkalu 2: Näkökulman vaihtaminen

Kuvaus Esimerkit Pohdi Palaute

Pohdintatehtävä

Kuinka hyvin pystyt itse vaihtamaan näkökulmaa myönteiseksi, päästämään pettymyksistä irti ja suhtautumaan asioihin avoimesti?

1. Näetkö yleensä enemmän mahdollisuuksia vai uhkia? Onko sinun lasisi yleensä puoliksi täynnä vai puoliksi tyhjä?
2. Osaatko päästää tapahtumista ja tunteista irti, vai jäätkö helposti kiinni tapahtuneeseen? Mitä tämä sinulle itsestäsi kertoo? Muistele jokin esimerkki ja käy läpi, mitä tilanteessa tapahtui.

Tähän kirjoittamasi teksti jää vain sinun tietosi eikä välity tutkijoille.

Tallenna luonnos Pohdinta valmis

Jatka >

VTT UNIVERSITY OF TAMPERE

Sivuston toteutus: Headsted Oy.  
Käyttöehdot ja rekisteriseloste

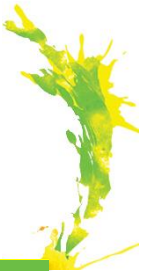

# Content of a tool (4/4): Feedback to researchers

The screenshot shows a web browser window with the URL <https://hyvostressi.fi/ohjelmani/sisalta/eustress/nakokulma/nakokulma-palaute/>. The page title is "Hyvän stressin työkalupakki > Peilaaminen ja suuntaaminen > Työkalu 2: Näkökulman vaihtaminen". The navigation menu includes "Kuvaus", "Esimerkit", "Pohdi", and "Palaute". The main content area is titled "Palaute: Terveiset tutkijoille" and contains the text: "Mitä mieltä olet tästä työkalusta? Onko siitä sinulle hyötyä ja mitä ajatuksia se herätti? Kerro terveisesti tutkijoille." Below this is a "Työkalun hyödyllisyys:" section with a five-star rating system (★★★★★) and a "Vapaa sana:" text input field. A green button labeled "Tallenna palaute" is positioned below the text field. To the right of the form is an image of a scroll and quill. At the bottom right of the form area is a green button labeled "Takaisin työkalupakkiin >".

**Star feedback: usefulness** →

**Free feedback** →

**This information is for researchers**

# Practise skills in daily life (1/3): Selecting an offline exercise

Select an exercise

Your plan and thoughts

Select if you want the exercise to be sent to you by email

This text can only be seen by you

In the end, confirm the selection

Hyvän stressin työkalupakki > Peilaaminen ja suuntaaminen > Kokeile arjessa

Kokeile arjessa

Kokeile nyt siirtää pelaamisen ja suuntaamisen työkalusarjan välineitä käytäntöön. Valitse jompikumpi alla olevista tehtävistä ja käytä siihen kotia aikaa tänään, huomenna tai tulevalle viikolle. Kokeile myös seuraavalle sivulle listattuja sovelluksia.

Valitse yksi seuraavista tehtävistä:

- Pidä palaveri itsesi kanssa**

Varaa aika itsellesi kalenterista ja pidä itsesi kanssa palaveri mieluisessa paikassa (esim. kahvilassa, ravintolassa, taidenäyttelyssä, puistossa tai metsässä). Käy keskustelua itsesi kanssa pohditen: Mikä sinulle on arvokasta ja tärkeää? Mihin haluat suunnata energiasi ja panostaa elämässäsi?

Laadi pohdinnostasi palaverimuistio: tunnista ja kirjaa elämässäsi 5 merkityksellintä asiaa, joiden toteutumisen haluat varmistaa. Kirjaa myös ylös tekoja, jotka edistävät tavoitteiden toteutumista sekä henkilöitä ja asioita joita voit hyödyntää resursseina matkallaasi kohti tavoitteita.

Miten voit muistuttaa itseäsi näistä merkityksellisistä asioista jatkossa? Teetkö niistä muistutuksen puhelimeesi, vai muistutuksen paperikalenteriin? Vai laaditko huoneentaulun työhuoneesi / kottsi seinälle?

Merkitse pohdinta-aikoja (toteutettuna yksin tai yhdessä) kalenteriin – olisiko sen tarve kerran päivässä, kerran tai muutaman kerran viikossa vai kuukausittain? Pyyhdy tuoliin pohtimaan, oletko "oikeiden" asioiden äärellä ja teetkö niitä "oikealla" tavalla. Arvioi vaikutuksia – huomaatko ajattelussasi ja/tai toiminnassasi mitään eroa?

- Piirrä vaikuttaminympyrä**

Piirrä kolmiekäinen ympyrä, jonka sisimmälle kehälle kirjaat niitä asioita joihin 1) voit itse vaikuttaa ja joista voit päättää. Kirjaa toiselle kehälle asioita joihin 2) voit itse vaikuttaa mutta joista et voi itse päättää, ja kolmannelle kehälle asioita joihin 3) vaikuttavat sinuun mutta joista et voi päättää. Mieti, mihin ympyrään haluat kohdentaa voimavaroitasi?

Käy ympyrästä keskustelua kollegasi / läheisesi kanssa, ja mietkää yhdessä tekoja joiden avulla varmistat voimavarojesi kohdentumisen tavoitteidesi mukaisesti. Mistä voit abitoita jo tänään? Havainnoi toimintaasi viikon ajan. Millaisia muutoksia huomaat?

Miten ja milloin toteutat tehtävän? Voit kirjata suunnitelmasi tai ajatuksiasi alle. Tshin kirjoittamasi teksti jää vain sinun tietosi eikä nähtävillä tutkijoille.

Aion tehdä tämän  En tee tätä vielä

Haluan tehdä tämän sähköpostini

Jatka

VTT UNIVERSITY OF TAMPERE

Sivuston toteutus: Headsted Oy. Käyttöehdot ja rekisteriseloste

# Practise skills in daily life (2/3): 3rd party applications

Hyvän stressin työkalupakki > Peilaaminen ja suuntaaminen > Kokeile arjessa

 Kokeile arjessa  Sovelluksia  Kuitaus

## Sovelluksia

Itsetuntemuksen kehittämiseen, pelaamiseen ja ajatusten suuntaamiseen löytyy myös sovelluksia mobiililaitteisiin ja verkossa. Voit kokeilla esimerkiksi seuraavia sovelluksia ja valita niistä mieleisesi.

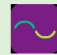

### Inflow

Inflow-sovelluksen avulla voi seurata mielialoja ja niihin liittyviä tekijöitä. Sovellus auttaa selvittämään, mitkä asiat ovat yhteydessä tunnetiloihin. Tiedot voi jakaa ystäville ja ystävien päivityksiä voi kommentoida.

[Lisätiedot](#)

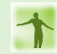

### Oiva

Oiva-sovellus opettaa läsnäolon taitoa, auttaa vaihtamaan näkökulmaa ja suuntaamaan ajatuksia uudelleen. Oiva auttaa myös kirkastamaan omia arvoja ja kulkemaan niiden viitoittamaa tietä. Oiva sisältää yli 40 erilaista harjoitusta, jotka voit kuunnella tai lukea. Harjoitukset ovat lyhyitä, pääosin 3-5 minuutin mittaisia.

[Lisätiedot](#)

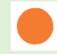

### Headspace

Headspace-sovellus opettaa läsnäolon taitoja. Headspace tarjoaa ilmaisen 10 kerran ohjelman tietoisuustaitojen harjoittamiseen. Ohjelma sisältää 10 minuutin kuunneltavia harjoituksia.

[Lisätiedot](#)

[Jatka >](#)

# Practise skills in daily life (3/3): Reflection and feedback (cannot be accessed before 24h from selecting the offline exercise)

*Ewstress* Työkalupakki Pohdinnat

Hyvän stressin työkalupakki > Myönteisen paineen rakentaminen > Kokeile arjessa

Kokeile arjessa Sovelluksia Kuittaus

Kulttaa kokeile arjessa -tehtävä

Aloitt seuravaan tehtävään 2.10.2015:

**Kokeile arjessa. Tervetuloon!**

Mikä työtehtävä "roikkuu" to do -listallasi mutta et syystä tai toisesta ole saanut turtuttua siihen? Merkitse deadline kalenteriin. Kerro tehtävästä ja aikataulun takarajasta kollegallesi ja/tai ystävällesi. Raportoi kollegallesi/ystävällesi kun olet saanut tehtävän tehtyä.

Kulttaa nyt, teitä tehtävään ja mitä tunteuksia se herätti. Tämä tieto välitetään tutkijoille, tosin kuin pohdintatehtävien kirjoittamasi tekstit.

Teitkö tehtävään?  Kyllä  Osittain  En

Mitä mieltä olti tehtävästä?

Oliko se hyödyllinen?  Erittäin hyödyllinen  Melko hyödyllinen  Jossain määrin hyödyllinen  Melko hyödytön  Täysin hyödytön

Alotko jatkaa tehtävään parissa myöhemminkin?  Kyllä  Ehkä  En

Kokeilitko jotakin sovellusta?  Kyllä  En

Mitä sovelluksia kokeilit ja mitä ne tuntuivat?

Valmis

Takaisin Työkalupakkiin >

VTT UNIVERSITY OF TAMPERE

Sivuston toteutus: *Insididit Oy*  
käyttöehdot ja rekisteriseloste

This data is  
can be seen by  
researchers



# Follow-up questionnaire

*Ewstress*

Työkalupakki Pohdinnat

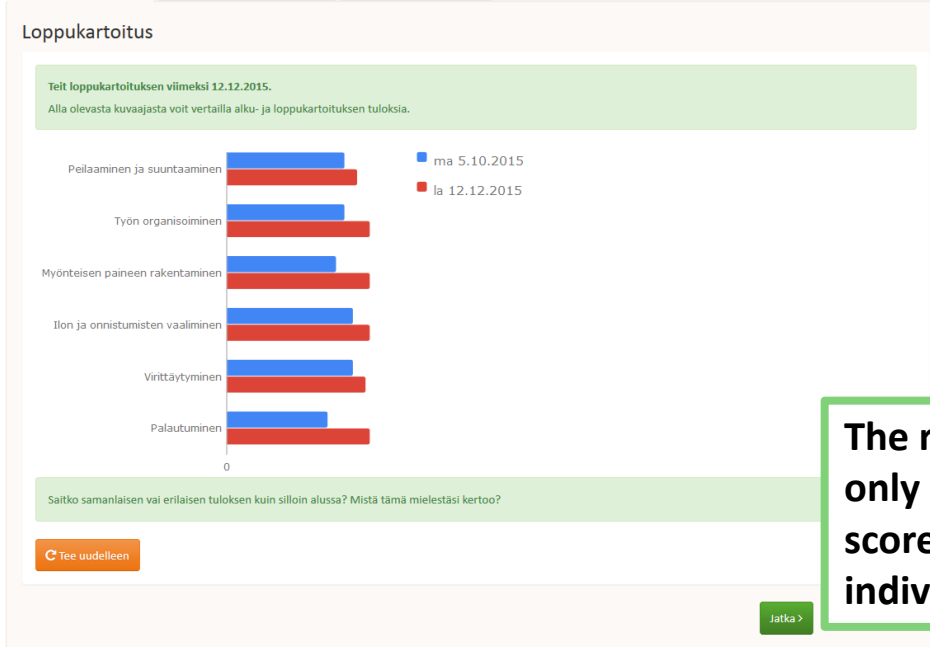

The researchers can see only the summary of the scores, not responses to the individual questions

*Ewstress*
